# Supplementary material for: Binding Affinity and Capacity for the Uremic Toxin Indoxyl Sulfate
Source: Toxins (Basel). 2014 Jan 24;6(2):416–29. doi: 10.3390/toxins6020416 (PMC3942743; doi:10.3390/toxins6020416)
Supplement: Supplementary File 1 — Supplementary Information (PDF, 230 KB) [file toxins-06-00416-s001.pdf]

## Supplemental Data Equation (1)

Protein bound toxins such as indoxyl sulfate (IS) may be described with the ligand-receptor theory since only non-covalent binding (for example via Van der Waals interactions) occurs. In this case the receptor is albumin, the main protein in plasma and also well-known to bind many hydrophobic compounds to its different binding sites, and the ligand is e.g., IS or any other uremic toxin. The free receptor  $R$  and free ligand  $L$  are always in equilibrium with the ligand-receptor complex  $RL$  (also: bound ligand to the receptor) according to the law of mass action:

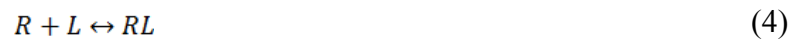

Toxin binding to albumin depends on the dissociation constant  $K_D$  [M] and on the binding capacity  $B_m$  [M] which is proportional to the number of binding sites on the protein (hypothesis of one site specific binding), according to:

$$RL = \frac{B_m \cdot L}{K_D + L} \quad (5)$$

It is possible to write  $L_T = L + RL$ , the total toxin concentration. Thus  $L = L_T - RL$  and (Equation (5)) can be rewritten as follows:

$$RL = \frac{B_m \cdot L_T - B_m \cdot RL}{K_D + L_T - RL} \quad (6)$$

This leads to:

$$RL \cdot (K_D + L_T + B_m) - RL^2 - B_m \cdot L_T = 0 \quad (7)$$

To solve Equation (7), only one physical possible solution is admitted given as:

$$RL = \frac{K_D + B_m + L_T - \sqrt{(K_D + B_m + L_T)^2 - 4 \cdot B_m \cdot L_T}}{2} \quad (8)$$

Since the protein bound fraction  $PBF$  is given by

$$PBF = \frac{RL}{L_T}$$

We obtain,

$$PBF = \frac{K_D + B_m + L_T - \sqrt{(K_D + B_m + L_T)^2 - 4 \cdot B_m \cdot L_T}}{2 \cdot L_T} \quad (9)$$

Equation (9) may be simplified by introducing  $\alpha$  as the toxin/receptor ratio with  $\alpha = L_T/B_m$  in order to write the PBF as a function of the total toxin concentration and toxin properties:

$$PBF = \frac{\frac{K_D}{B_m} + \alpha + 1 - \sqrt{\left(\frac{K_D}{B_m} + \alpha + 1\right)^2 - 4 \cdot \alpha}}{2 \cdot \alpha} \quad (1)$$
